# Supplementary material
Source: PubMed Central journal article supplement (PMC4910590)

## Supplementary materials

**Figure S1. Calcium response is intact in *elmo1<sup>kd</sup>* cells upon chemoattractant SDF1 $\alpha$  stimulation.** **A.** Normal expression of chemokine receptor CXCR4 in *elmo1<sup>kd</sup>* cells. **B.** Montage shows calcium response of control (CTL) and *elmo1<sup>kd</sup>* cells with or without pertussis toxin (PT) treatment upon the stimulation of 100 ng/ml SDF1 $\alpha$ . The cells were treated with calcium indicator 1  $\mu$ M Fluo4 (Green, Molecular Probe) 30 min before the experiments. Arrows point to the cells display strong calcium response. The quantitation of calcium response in each group of cells is presented in **C**. The fluorescent intensity of cells at time 0 is normalized to 1. Mean  $\pm$  SD is shown, n=7 or n=10 in CTL or PT-treated cells, respectively.

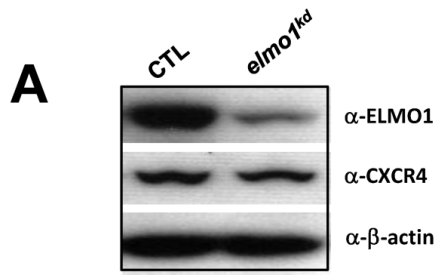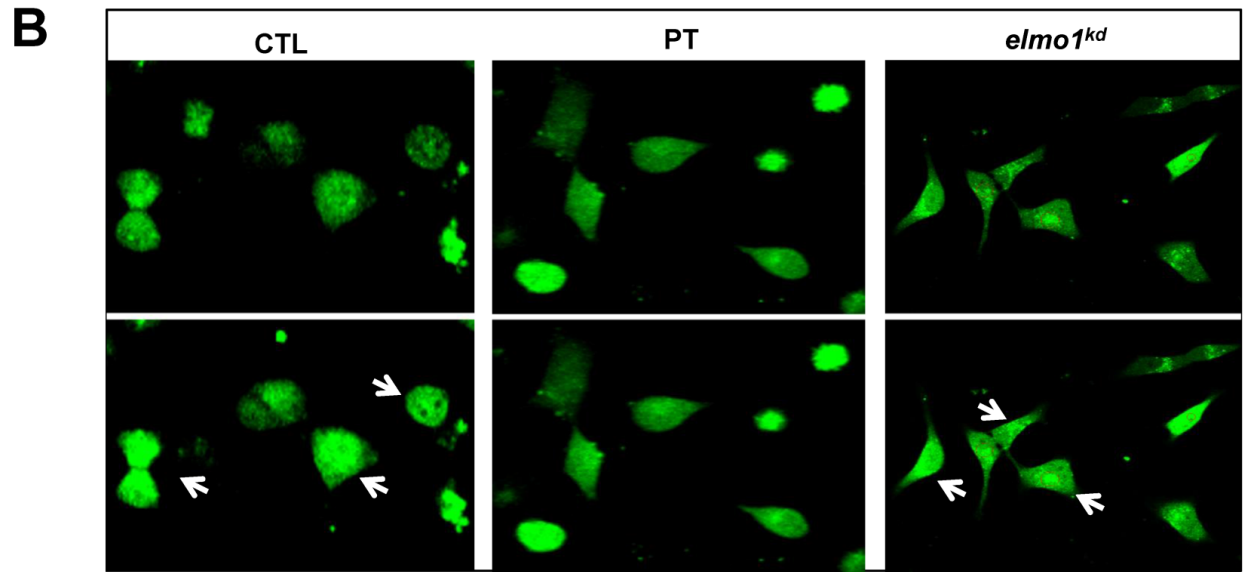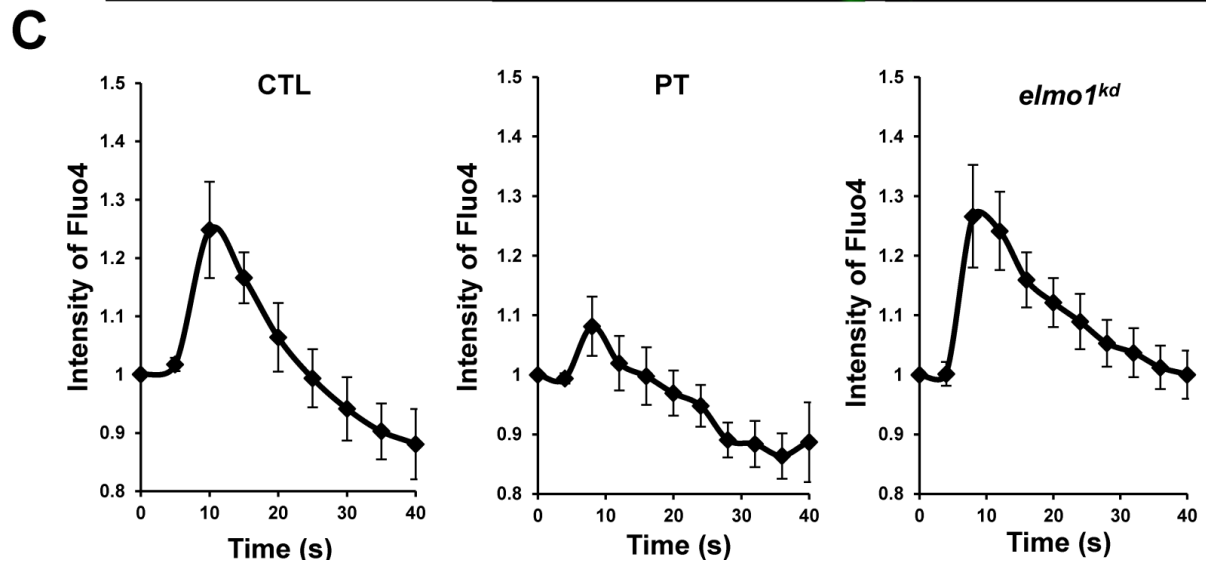

Supplement: jcav07p0973s1.pdf [file jcav07p0973s1.pdf]
